# Supplementary material
Source: Research Square preprint supplement (doi:10.21203/rs.3.rs-9193345/v1)
Supplement: Supplementary file 1 [file 1e501357a1743b6d638579ac.docx]

Supplementary Information

**Title: “The Effectiveness of Multidrug Chemotherapy witt Olaparib, Temozolomide and Oxaliplatin Compared to Radiotherapy in Glioblastoma Multiforme *in Vitro* Models and Human Fibroblasts”**

**Author names and affiliations:**

Anna Zając-Grabieca*, Anna Czopekb*, Paula Ajerschf, g, Filip Michałkiewiczc, Dominik Wiśniewskie, Monika Baniaa, Marta Bałamuta, Dawid Krzempeka Krzysztof Łukowicza, Tomasz Skórad, Beata Biesagah , Justyna Miszczyka

a Department of Medical Physics, Institute of Nuclear Physics, Polish Academy of Sciences, Radzikowskiego 152, 31-342 Kraków, Poland.

b Department of Medicinal Chemistry, Faculty of Pharmacy, Jagiellonian University Medical College, Medyczna 9, 30-688 Kraków, Poland

c Faculty of Biochemistry, Biophysics and Biotechnology, Jagiellonian University, Gronostajowa 7, 30-387 Kraków, Poland

d Maria Skłodowska-Curie National Research Institute of Oncology, Radiotherapy Department, Garncarska 11, 31-115 Kraków, Poland

e Wroclaw University of Science and Technology, Wybrzeże Stanisława Wyspiańskiego 27, 50-370 Wrocław, Poland

f Laboratory of Physiology and Toxicology of Reproduction, Institute of Zoology and Biomedical Research, Faculty of Biology, Jagiellonian University in Krakow, 30-387, Krakow,Poland
g Doctoral School of Exact and Natural Sciences, Jagiellonian University, 30-348, Krakow, Poland

h Department of Tumor Pathology, Maria Skłodowska-Curie National Research Institute of Oncology, Cracow Branch, Garncarska 11, 31-115 Cracow, Poland

**Corresponding authors:**

Anna Zając-Grabiec,PhD. [anna.zajac-grabiec@ifj.edu.pl](mailto:anna.zajac-grabiec@ifj.edu.pl)

Department of Medical Physics, Cyclotron Centre Bronowice, Institute of Nuclear Physics, Polish Academy of Sciences, Radzikowskiego 152, 31-342 Kraków, Poland.

Anna Czopek, PhD. [anna.czopek@uj.edu.pl](mailto:anna.czopek@uj.edu.pl)

Department of Medicinal Chemistry, Faculty of Pharmacy, Jagiellonian University Medical College, Medyczna 9, 30- 688 Kraków, Poland

**MATERIALS AND METHODS:**

1. **Cell lines and cell culture**

In this study, different glioblastoma multiforme (GBM) cell lines, methylated ( U87MG, U118MG) MGMT promoters at varying concentrations. A human fibroblast line (hFib) obtained from a healthy donor were used as a control system. Cell lines were purchased from the American Type Culture Collection (U118 MG, Cat. No. HTB-15; U87 MG, Cat. No. HTB-14). Cell lines U118 was cultured with Dulbecco’s Modified Eagle’s Medium (Cat. No. 30-2002, ATCC), and U-87 with Eagle’s Minimum Essential Medium (Cat. No. 30-2003, ATCC). Medium for U118 cell line was supplemented with 10% fetal bovine serum (Cat. No. F7524, Sigma-Aldrich Inc). In the case of the U87 cell culture, fetal bovine serum (Cat. No. 30-2020, ATCC) was applied. All cell cultures were incubated at 37˚C and 5% CO2.

To obtain a self-derived hFib that served as a control, a fragment of the epidermis was taken from a healthy person (woman, 42 years). A small fragment was cut from the inner side of the forearm using a disposable scalpel and incubated for 24 hours in a Dulbecco’s Modified Eagle’s Medium (Cat. No. 31966021, Thermofisher, Walthamsupplemented with collagenase, type I, (Cat. No. SCR103, Sigma-Aldrich, Inc.), 10% heat-inactivated fetal bovine serum (Cat. No. F9665, Sigma-Aldrich Inc.), 1% sodium pyruvate (Cat. No. P5280, Sigma-Aldrich Inc.) and antibiotic antimycotic solution (Cat. No. A5955, Sigma-Aldrich.). After 24 hours, the epidermis fragment was cut into smaller pieces and transferred to a culture bottle. Cells from 4-5 passages were used for the experiments.

1. **Chemiotherapeutics**

2.1 Chemotherapeutics and their chemical synthesis

Temozolomide (TMZ) and oxaliplatin (OXA) were obtained from Sigma-Aldrich (Cat. No. T2577 and Cat. No. PHR1528, St. Louis, MO). The starting reagent for OLA synthesis, 2-fluoro-5-((4-oxo-3,4-dihydrophthalazin-1-yl)methyl)benzoic acid, was commercially available (Cat. No. A330791, Angene). All three drugs were dissolved in dimethyl sulfoxide (DMSO) (Cat. 3176, Tocris) to create a stock solution of 10 mM. In the cellular experiments, the starting concentration was OLA 1µM, TMZ 10 µM, and OXA 50 µM.

Olaparib (OLA) was synthesized through a three-step process following the literature data [https://doi.org/10.1021/jm8001263]. The starting substrate for OLA synthesis, 2-fluoro-5-((4-oxo-3,4-dihydrophthalazin-1-yl)methyl)benzoic acid was commercially available (Angene).

Thin-layer chromatography (TLC) was performed on Merck silica gel 60 F254 aluminum sheets (Merck, Darmstadt, Germany) using the following solvent systems: S1 - dichloromethane/methanol (9:0.7, v/v) and S2 - dichloromethane/methanol/ammonia (9:0.7:0.15, v/v). Spots were visualized by their UV absorption at 254 nm. HPLC analyses were conducted using a Waters HPLC system equipped with a photodiode array detector (Waters 2998, Milford, USA) and a Chromolith RP-18 SpeedROD column (4.6 × 50 mm). The conditions included a flow rate of 5 mL/min with eluent A (water containing 0.1% TFA) and eluent B (acetonitrile containing 0.1% TFA). A gradient of 0–100% eluent B over 3 minutes was applied. Standard solutions of each compound (1 mg/mL) were prepared in acetonitrile/water (50:50, v/v) with 0.1% TFA, and detection was carried out at 214 nm. The purity of the investigated compounds (1–16) was greater than 95%. Mass spectra for the compounds were acquired using a Waters ACQUITY™ TQD system with a TQ Detector (Waters, Milford, USA) and an ACQUITY UPLC BEH C18 column (1.7 µm, 2.1 × 50 mm, Waters, Milford, USA). NMR spectra were recorded on a JEOL spectrometer operating at 500 (1H NMR) and 126 (13C NMR) MHz. The measurements were performed in CDCl₃ or hatu solution with tetramethylsilane (TMS) as the internal standard. Chemical shifts are reported as δ values (ppm), and coupling constants (J) are expressed in Hertz (Hz). Signal multiplicities are denoted as follows: s (singlet), br s (broad singlet), d (doublet), dd (double doublet), t (triplet), dt (doublet of triplets), td (triplet of doublets), and m (multiplet).

**Procedure for the synthesis of *4-(4-fluoro-3-(piperazine-1-carbonyl)benzyl)phthalazin-1(2H)-one* (2)**

In a round-bottom flask, 2-fluoro-5-((4-oxo-3,4-dihydrophthalazin-1-yl)methyl)benzoic acid (1.7 mmol), BOC-piperazine (2.0 mmol), and TBTU (2.0 mmol) were dissolved in 4 mL anhydrous dimethylformamide (DMF). Following the addition of triethylamine (3.3 mmol), the mixture was stirred at room temperature for 2 hours. Then distilled water (~7 mL) was added, and the mixture was cooled to 0°C for 1 h. It was filtered and then washed with an ice-cold DMF/water mixture (1/1), distilled water, isopropanol, and diethyl ether (2x2 mL each). Then, obtained compound (3.3 mmol) was dissolved in 4 mL of ethanol, mixed with 6N hydrochloric acid (7 mL), and stirred at room temperature for 3 hours. Then, the reaction mixture was adjusted to pH 10 using sodium bicarbonate and extracted with dichloromethane (3 x 20 mL). The organic layers were combined, dried over sodium sulphate, filtered, and concentrated.

White powder. Yield: 77%; TLC: Rf = 0.2 (S2); HPLC: Rt = 0,719 (99%), C20H19FN4O2 (366.40); *m/z* 366.15; [M+H]+ = 367,34; 1H NMR (500 MHz, CDCl3-*d*) δ ppm 2.91 (br t, *J*=4.73 Hz, 1 H) 3.04 (br s, 1 H) 3.14 (br s, 4 H) 3.40 (br s, 1 H) 3.85 (br s, 1 H) 4.23 (s, 2 H) 6.90 - 7.03 (m, 1 H) 7.20 - 7.31 (m, 2 H) 7.64 - 7.76 (m, 3 H) 8.36 (dt, *J*=6.44, 1.00 Hz, 1 H).

**Procedure for the synthesis of *4-(3-(4-(cyclopropanecarbonyl)piperazine-1-carbonyl)-4-fluorobenzyl)phthalazin-1(2H)-one* (OLA)**

Compound **2** (0.8 mmol) was dissolved in dichloromethane (4.2 mL) and stirred at 0°C for 30 min. Then triethylamine (0.92 mmol) was added, followed by the gradual addition of cyclopropanecarbonyl chloride (0.92 mmol). At 0°C, the resulting reaction mixture was stirred for another 30 min. Approximately 8 mL of 10% sodium bicarbonate solution quenched the reaction, followed by extraction with dichloromethane (3 x 15 mL). The organic layers were combined, dried over sodium sulphate, filtered, and concentrated. The resulting product was purified by flash chromatography using a dichloromethane : methanol : diethyl ether (9:0.7:0.05; v/v) solvent system.

White powder. Yield: 60%; TLC: Rf = 0.39 (S1); HPLC: Rt = 1.045 (99%), C24H23FN4O3 (434.47), *m/z* 434.18 [M+H]+ = 435.12; 1H NMR (500 MHz, DMSO-*d*6) δ ppm 0.65 - 0.72 (m, 4 H) 1.79 - 2.04 (m, 1 H) 3.08 - 3.23 (m, 2 H) 3.36 (br s, 1 H) 3.46 - 3.77 (m, 5 H) 4.29 (s, 2 H) 7.20 (br t, *J*=8.95 Hz, 1 H) 7.34 (br s, 1 H) 7.39 - 7.42 (m, 1 H) 7.77 - 7.80 (m, 1 H) 7.85 (br t, *J*=7.41 Hz, 1 H) 7.91 - 7.93 (m, 1 H) 8.22 (d, *J*=7.80 Hz, 1 H) 12.57 (s, 1 H); 13C NMR (DMSO-*d6*, 126 MHz) δ 171.8, 164.6, 159.9 (d, *J* = 244.9), 156.9, 145.4, 135.4 (d, *J* = 3), 134.0, 132.3, 132.1, 129.6, 129.5 (d, *J* = 3.8), 128.4, 126.6, 126.0, 124.1 (d, *J* = 18.4), 116.5 (d, *J* = 27.7), 55.4, 37.0, 10.9, 7.7.


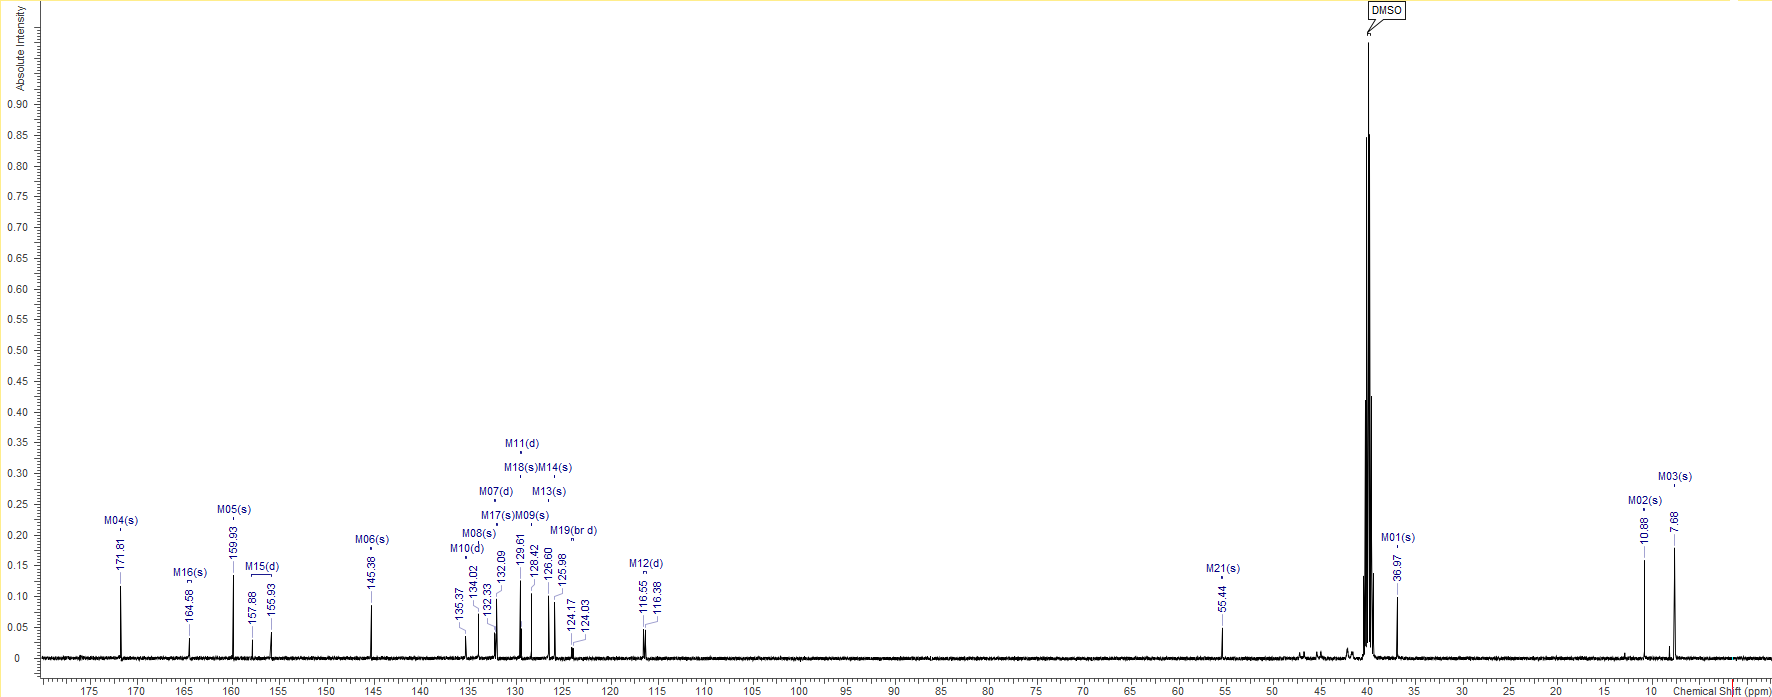


1. **Irradiation with a Cobalt-60 (Co-60) beam and dosimetry**

The dosimetric equipment was calibrated at the Secondary Standard Dosimetry Laboratory (SSDL) of the National Institute of Oncology (NIO PIB), Warsaw, following the IAEA TRS-398 protocol. Dose measurements were performed at the isocentre, at a depth of 5 cm, using a solid PMMA phantom. The radiation field size was 25 × 21 cm², and the source-to-chamber distance was 80 cm. For all irradiations, the dose rate remained within the range of 0.0115–0.0136 Gy/s, with an average of 0.0125 Gy/s. Irradiations were performed in ambient conditions, and immediately after irradiation, the cells were transported to the radiobiological laboratory located at IFJ PAN for further processing. Non-irradiated part of the sample served as a control (0.0 Gy).

1. **Cell viability assessment of OLA, TMZ, OXA, and their combination with radiotherapy by MTS test**

Cell viability test was evaluated by Multiskan SkyHigh Microplate Spectrophotometer (ThermoFisher Scientific)with MTS test. All cells hFib, U87, U118, were seeded in 96-well plates (4×103 cells/well, Sarstedt, Numbrecht, Germany) and incubated for 24 h. Then the media were replaced with 200 μl of complete media mixture containing concentrations of OLA (1 μM, 100 μM), TMZ (10 μM, 100 μM) and OXA (50 μM, 100 μM, 200 Μm) and in combination: 50 μM OLA with 50 μM TMZ, or 50 μM OXA with 50 μM TMZ, or 50 μM OXA with 50 μM OLA, and in triplet 50 μM OXA+50 μM OLA+50 μM TMZ.

Immediately after drug addition, the plates were exposed to ionizing radiation using a cobalt-60 (Co-60) source at doses of 2 Gy or 4 Gy. This experimental setup was designed to assess potential synergistic effects between chemotherapeutics and radiotherapy. Following 72 hours of incubation, cell viability was measured using the MTS assay and quantified with a Multiskan SkyHigh Microplate Spectrophotometer (ThermoFisher Scientific) as previously described.

All groups of cells were initially plated in triplicate and later in quadruplicate for statistical analysis. Cell viability was tested using MTS (3-(4,5,-dimethylthiazol-2-yl)-5-(3-carboxymethoxyphenyl)-2-(4-sulfophe[1]nyl)-2H-tetrazolium) test (CellTiter 96® Aqueous One Solution Cell Proliferation Assay, Cat. No. G3582)

Briefly, after an incubation period of 72 h with chemotherapeutics 100 µL medium without drugs and 20 µL of MTS dye solution were added per well and incubated for 2 h. The quantity of formazan product, directly proportional to the number of living cells in culture was detected by absorbance measurements at 490 nm with a 96-well plate reader program (Spark® Tecan, Mannedorf, Switzerland) and program (SkanIt RE 7.0.2.) by two-way ANOVA with Tukey’s post hoc test (p < 0.05) and visualized using GraphPad Prism 8 software. Each sample was measured three times. The measurements were stopped when the absorbance of the control exceeded the value of 2.0.

**4. Cell death analysis**

After 72 hours of combined treatment, cell death was assessed using the Apoptotic, Necrotic & Healthy Cells Quantification Kit (Cat. 37-30018-1, Biotium) following the manufacturer’s protocol, in combination with fluorescence microscopy (Zeiss Axio Imager Z2, MetaSystems™, Altlussheim, Germany). Images were acquired and analyzed with ISIS software (MetaSystems™) to quantify early and late apoptosis, necrosis, and live cell populations. For each condition, 4–6 representative fields containing at least 100 cells per field were evaluated. All slides were coded and analyzed in a blinded manner. Results are presented as percentages of total cells for each population (early apoptosis, late apoptosis, necrosis, live cells) after 72 hours of treatment.

1. Three cell lines (3×104) were seeded in Tissue Culture Plate – 6 well test plates for adherent and suspension cultures (Cat. 92406, TPP), sterile, individually packed, and incubated in a complete medium without the drug for 24 h. Further incubation was performed for 72 h after changing the medium to the following:   serum-free DMEM (control groups),
2. 100 μM OLA in serum-free DMEM (OLA group)
3. 100 μM TMZ in serum-free DMEM (TMZ group),
4. 50 μM OXA in serum-free DMEM (OXA group)
5. 100 μM OXA in serum-free DMEM (OXA group)
6. 200 μM OXA in serum-free DMEM (OXA group)
7. 50 μM TMZ + 50 μM OLA in serum-free DMEM (TMZ + OLA group).
8. 50 μM TMZ + 50 μM OLA + 50 μM OXA in serum-free DMEM (TMZ + OLA+ OXA group)
9. 50 μM OXA + 50 μM OLA in serum-free DMEM (OXA + OLA group)

The medium from each well was transferred into a pre-labeled separate centrifuge tube. Adherent cells from the same well were then trypsinized and transferred to the same tubes. All samples were centrifuged, and the supernatant was discarded. Pellets were re-suspended in a solution containing 5 μl Annexin V-FITC conjugated and 5 μl Ethidium Homodimer III (EthD-III) and incubated for 15 minutes in the dark at room temperature.

EthD-III is a highly positively charged nucleic acid probe, which is impermeant to live cells, but stains cells with compromised membrane integrity with red fluorescence.  EthD-III is a superior alternative to Propidium Iodide (PI) because of its significantly higher affinity for DNA and higher fluorescence quantum yield. The number of apoptotic and necrotic cells was assessed by manually counting 100 random microscopic fields per person. The Apoptosis and Necrosis Quantitation Kit provides a convenient assay for quantifying apoptotic (green) and necrotic (red) cells within the same cell population by fluorescence microscopy[ https://doi.org/10.1007/s43440-025-00783-w]. Apoptosis can be determined using morphological analysis of cells. Fluorescence microscopy is a basic technique enabling the recognition of morphological changes associated with apoptosis and necrosis. Typical features of an apoptotic cell are chromatin condensation, reduction of cell volume, and formation of apoptotic bodies. Fluorescence microscopy, using dyes such as Hoechst and annexin V, enables selective staining of dead and live cells, as well as cells in the early phases of apoptosis, which combine with phosphatidylserine, which moves to the outer side of the cell membrane in the apoptotic process [https://doi.org/10.3390/cancers13246287]. Additional staining with EthD-III allows the identification of dead necrotic cells and their differentiation from those undergoing apoptosis [https://doi.org/10.1007/s43440-025-00783-w; https://doi.org/10.1038/sj.bjc.6604856; https://biotium.com/product/apoptotic-necrotic-healthy-cells-quantification-kit/].

As demonstrated by Annexin V and EthD-III staining, heterogeneous cell populations, including live and dead cells, were present after induction of apoptosis as well as after induction of necrosis by chemotherapy exposure [https://doi.org/10.1007/s43440-025-00783-w; https://doi.org/10.1038/sj.bjc.6604856]. Selective collection and analysis of live cells (Annexin V-FITC−/ EthD-III − population), early apoptotic cells (Annexin V-FITC+/ EthD-III −), late apoptotic cells (Annexin V-FITC+/ EthD-III +), and necrotic cells (Annexin V-FITC+/ EthD-III +) by fluorescence imaging (Isis FISH Imaging System V 5.7).
